# Supplementary material for: Optimization of the cytogenetic protocol for Pangasianodon hypophthalmus (Sauvage, 1878) and Clarias gariepinus (Burchell, 1822)
Source: PeerJ journal article supplement (doi:10.7717/peerj.5712), 2018-11-05
Supplement: Unprocessed_cytogenetic_data.pdf [file Unprocessed_cytogenetic_data.pdf]

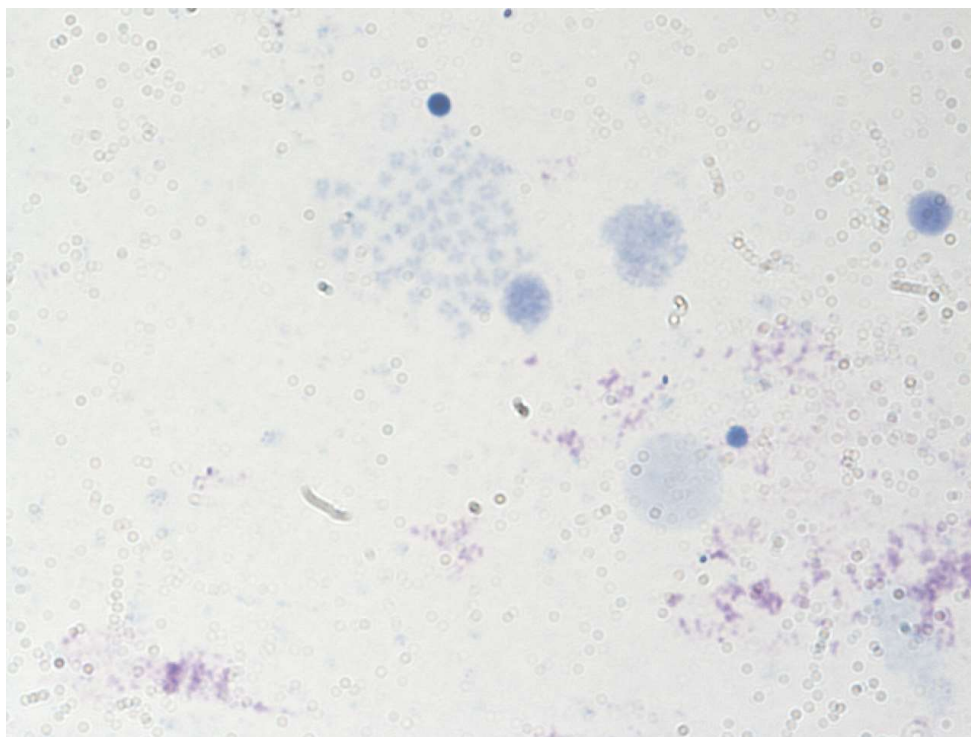

Sample of unprocessed metaphase spread from first treatment

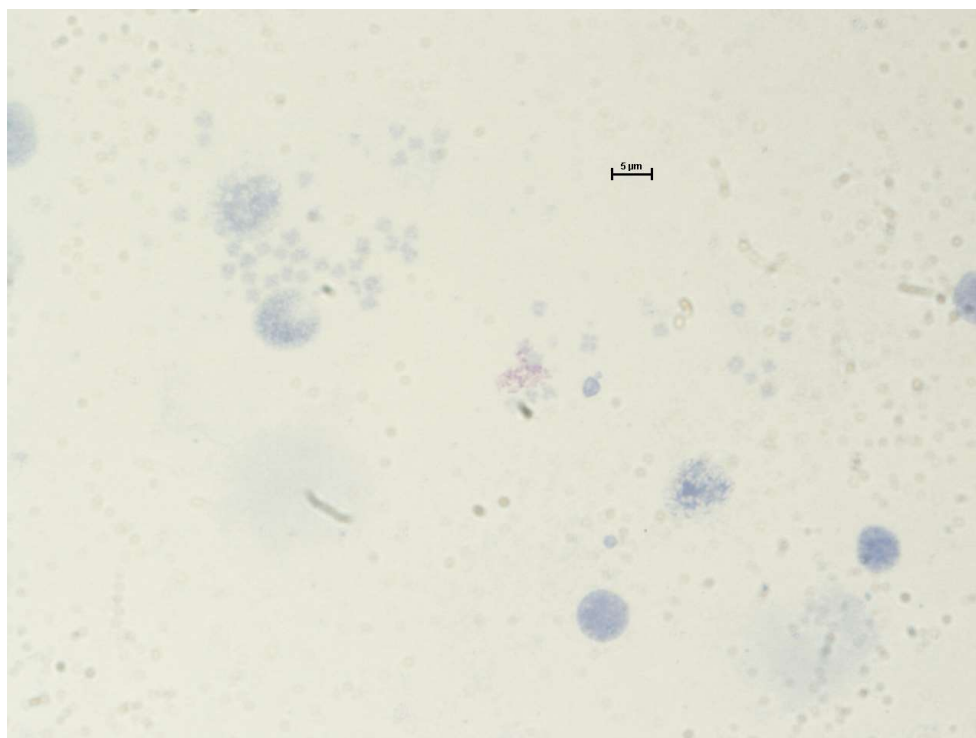

Sample of unprocessed metaphase spread from first treatment

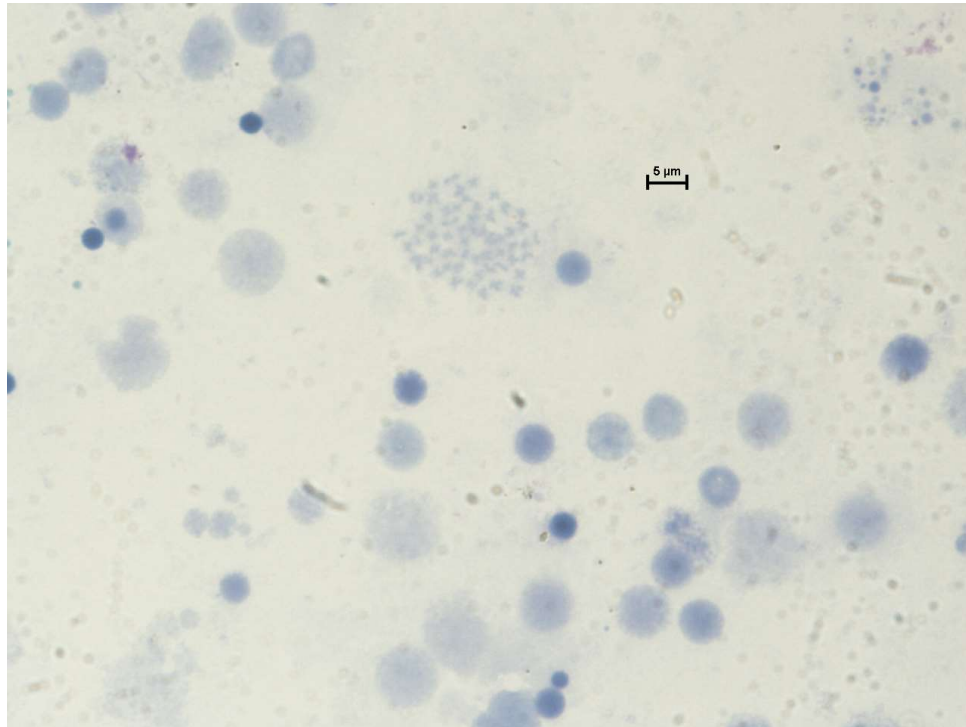

Sample of unprocessed metaphase spread from first treatment

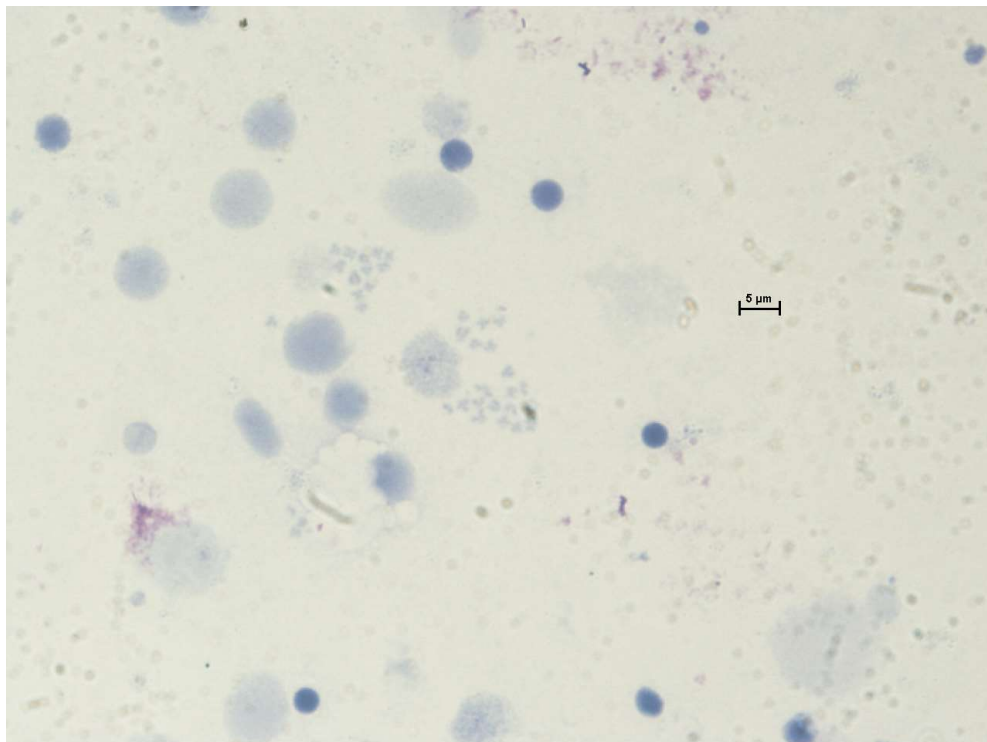

Sample of unprocessed metaphase spread from first treatment

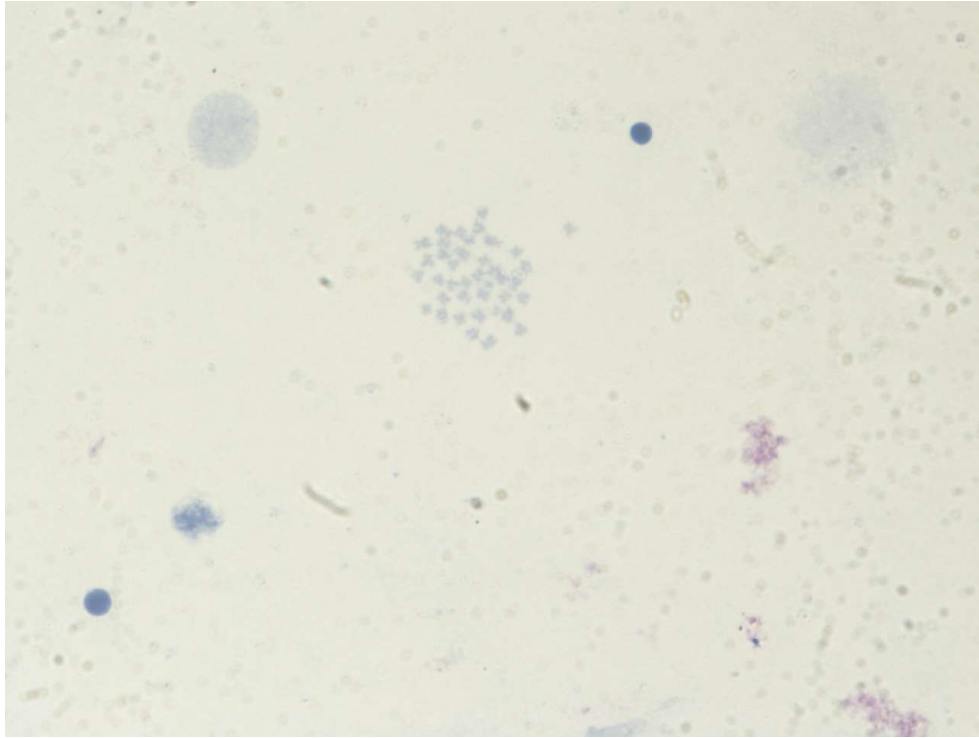

Sample of unprocessed metaphase spread from first treatment

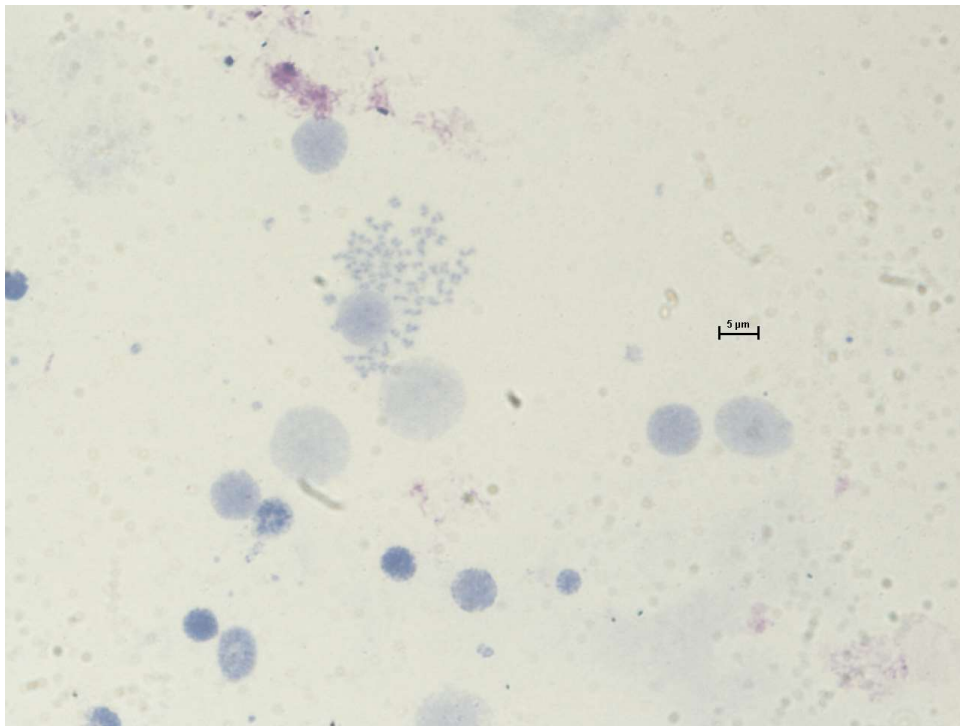

Sample of unprocessed metaphase spread from first treatment

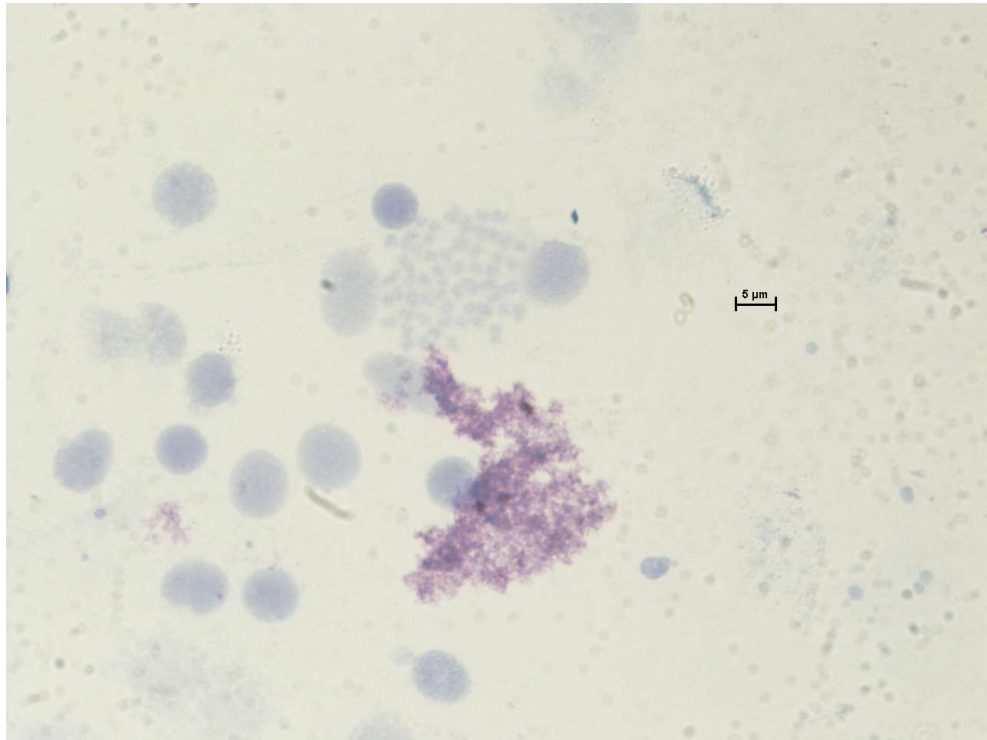

Sample of unprocessed metaphase spread from second treatment

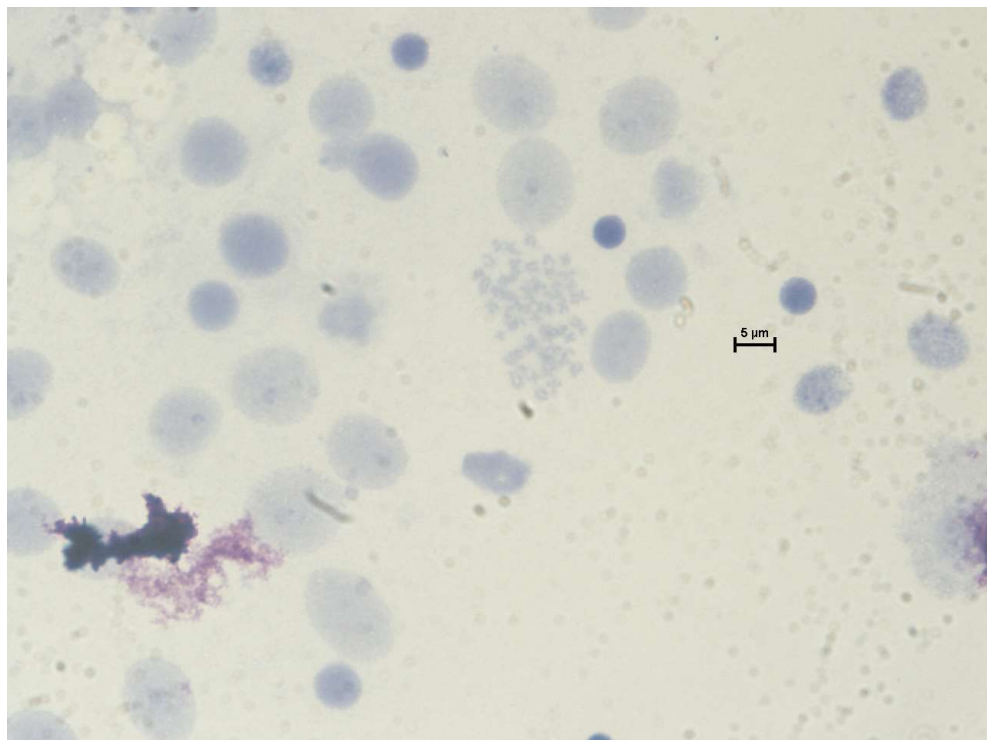

Sample of unprocessed metaphase spread from second treatment

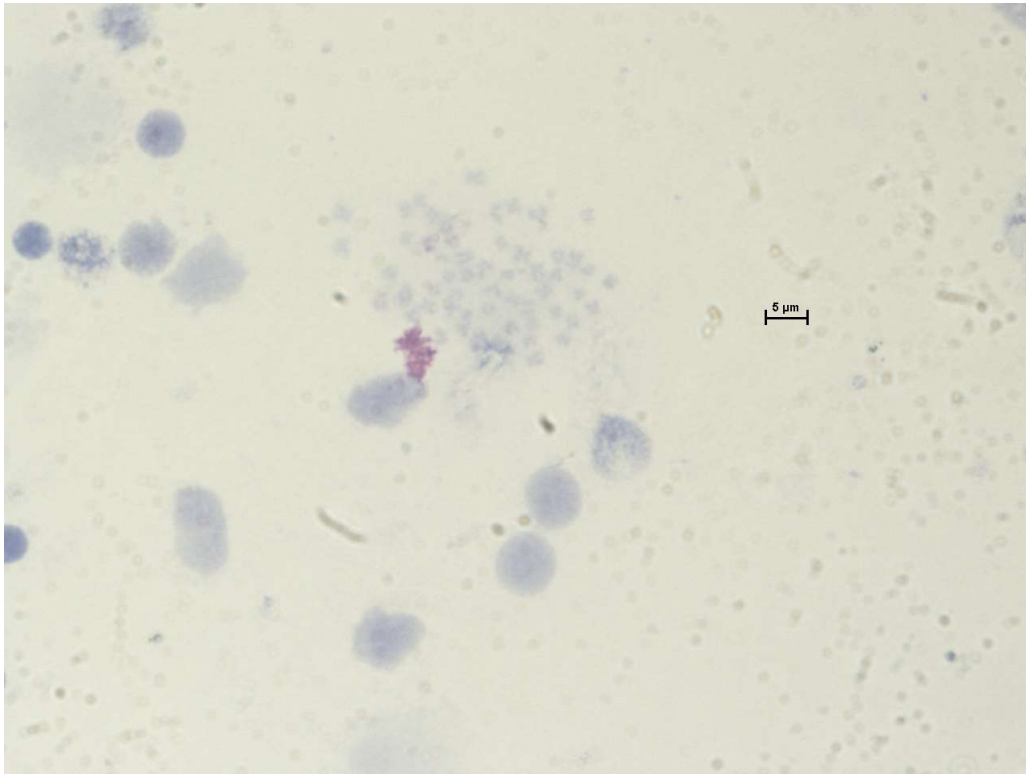

Sample of unprocessed metaphase spread from second treatment

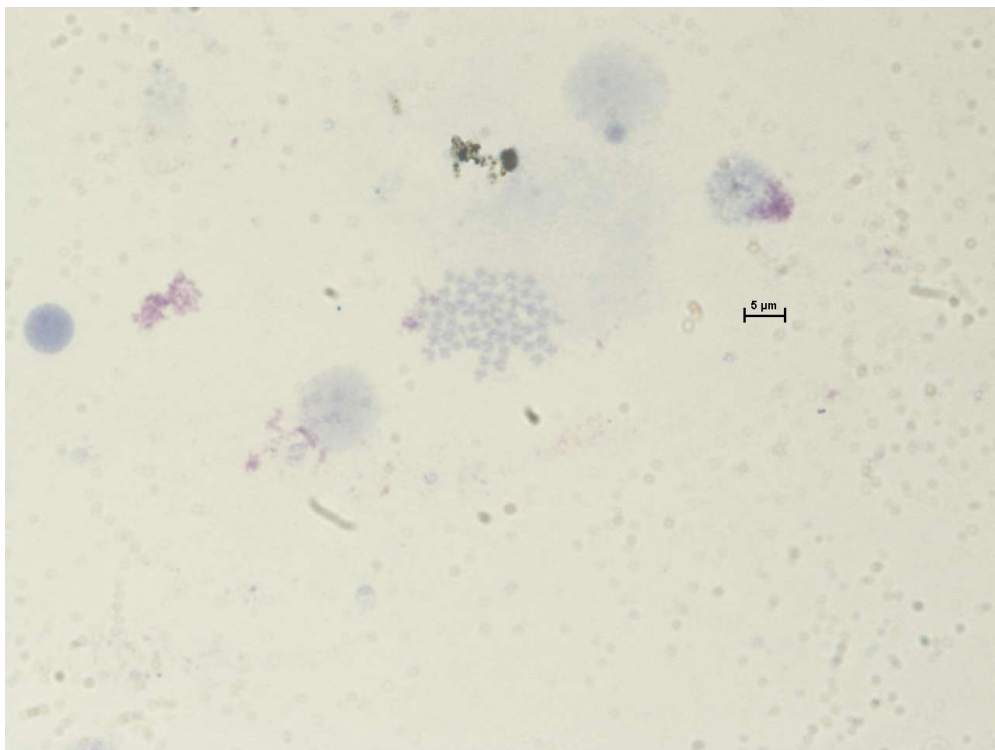

Sample of unprocessed metaphase spread from second treatment



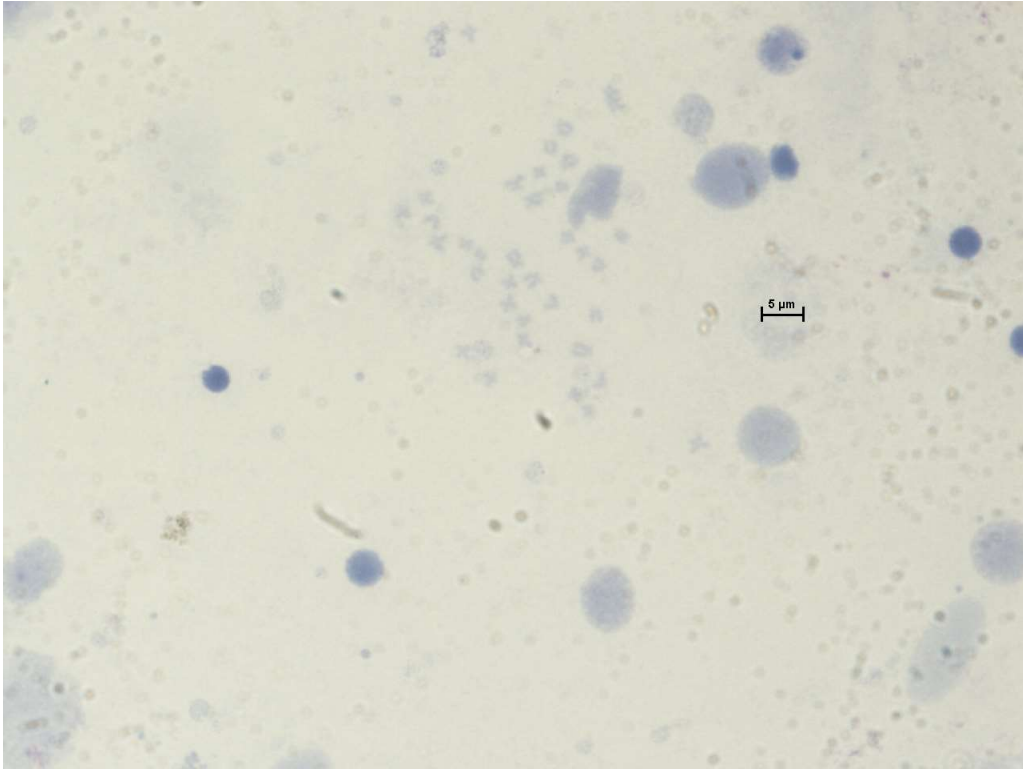

Sample of unprocessed metaphase spread from second treatment

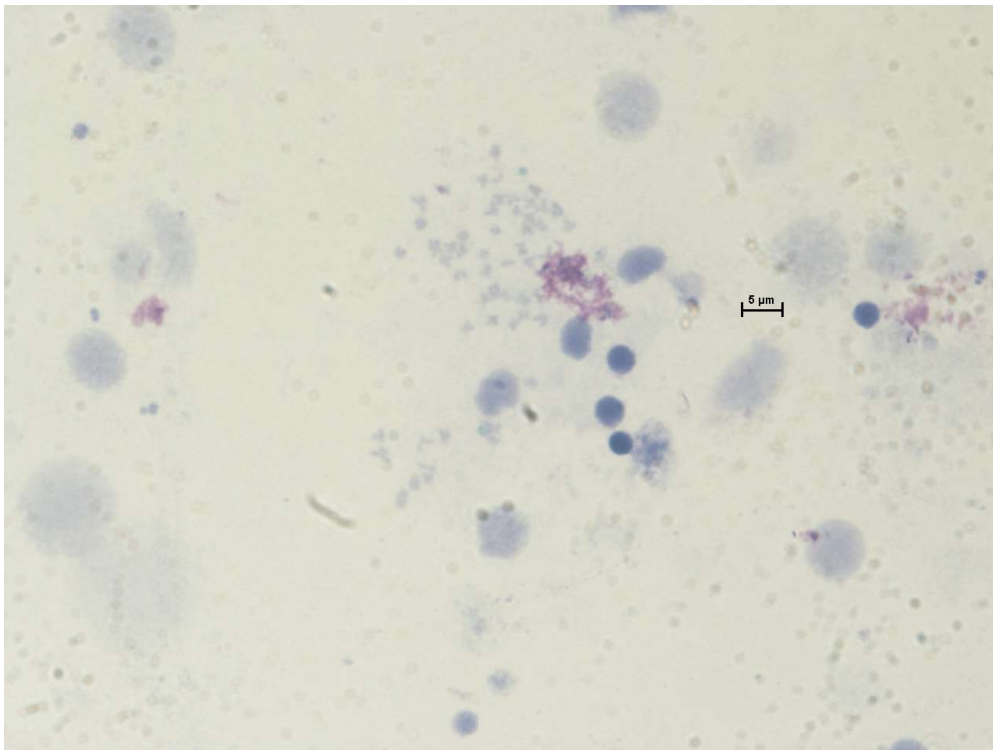

Sample of unprocessed metaphase spread from second treatment

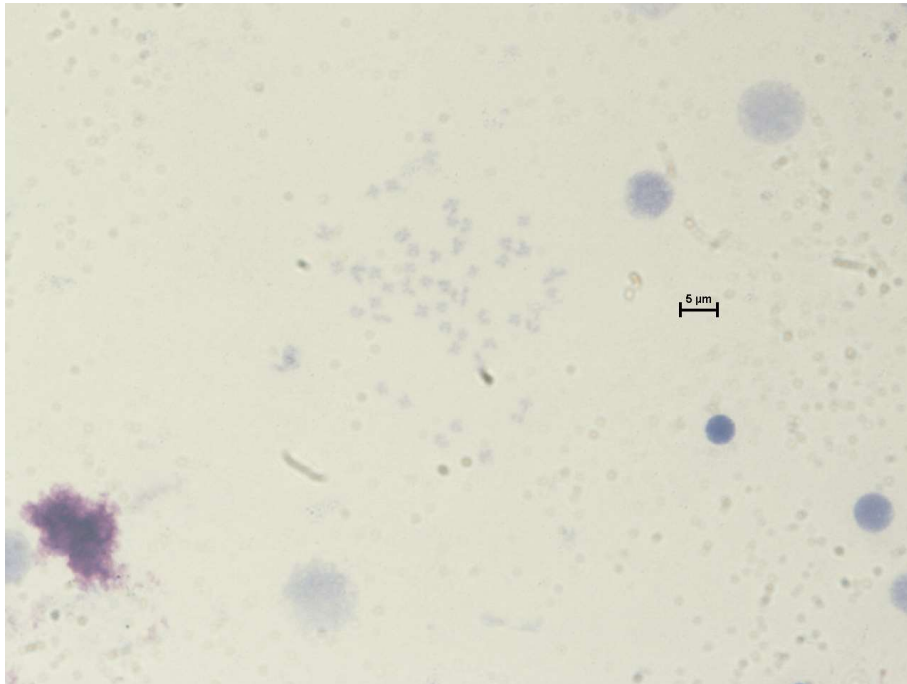

Sample of unprocessed metaphase spread from third treatment

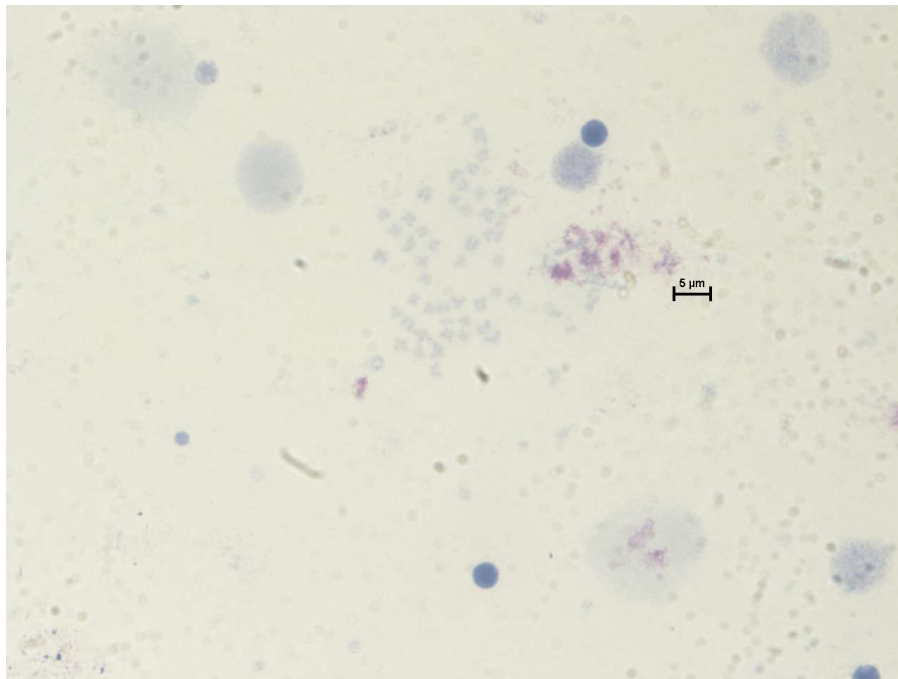

Sample of unprocessed metaphase spread from third treatment

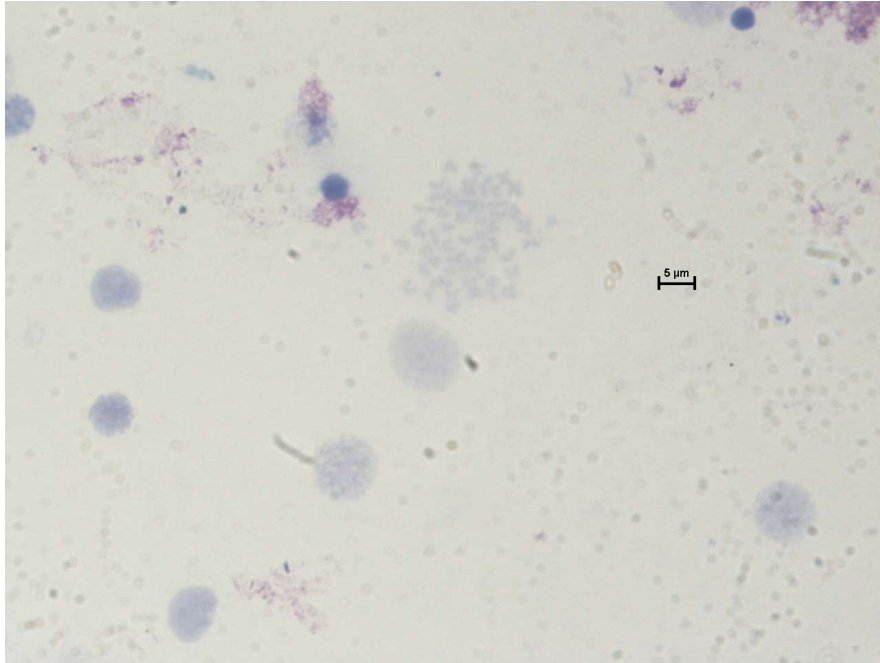

Sample of unprocessed metaphase spread from third treatment

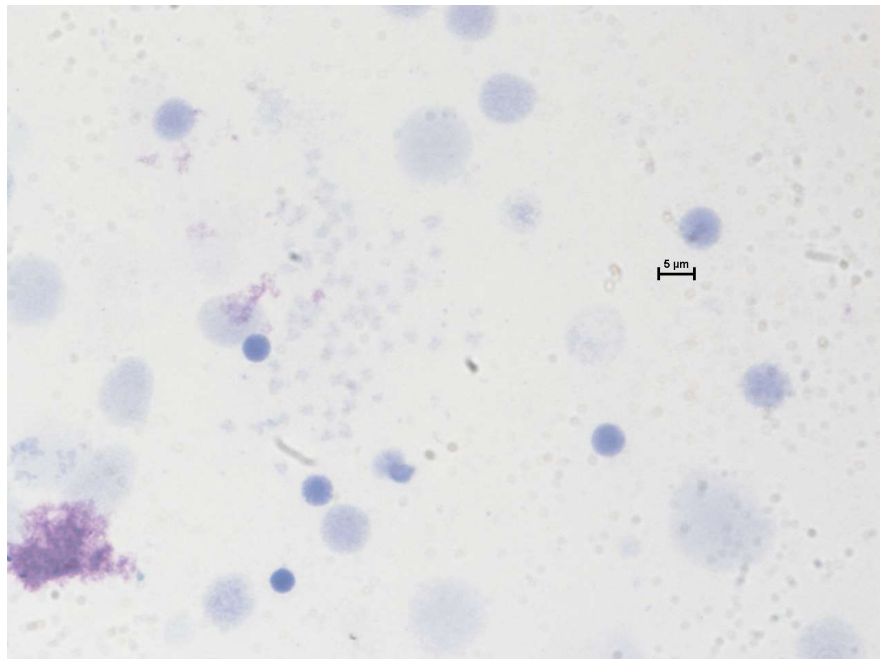

Sample of unprocessed metaphase spread from third treatment



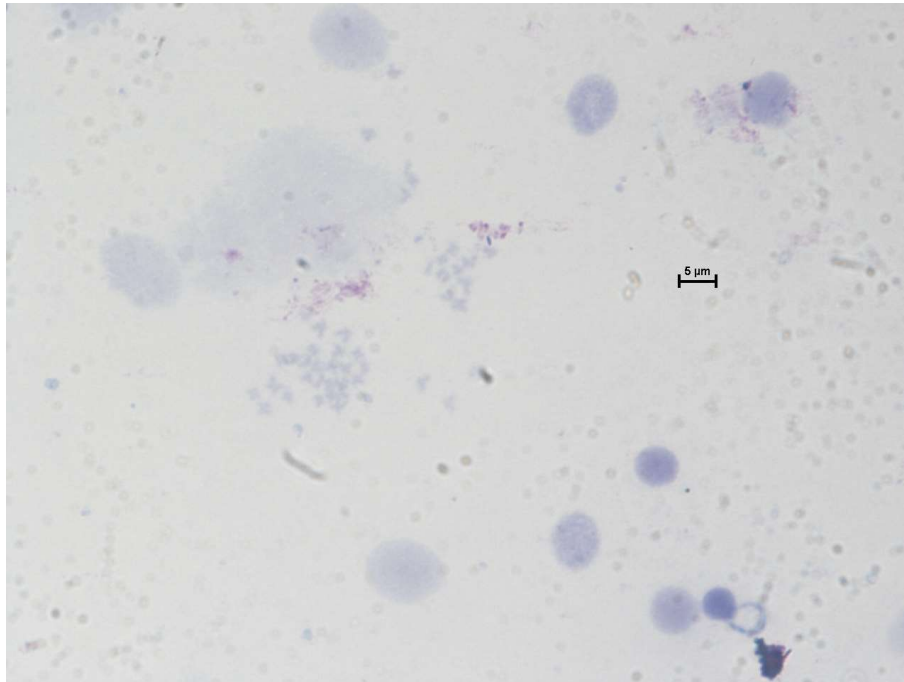

Sample of unprocessed metaphase spread from third treatment

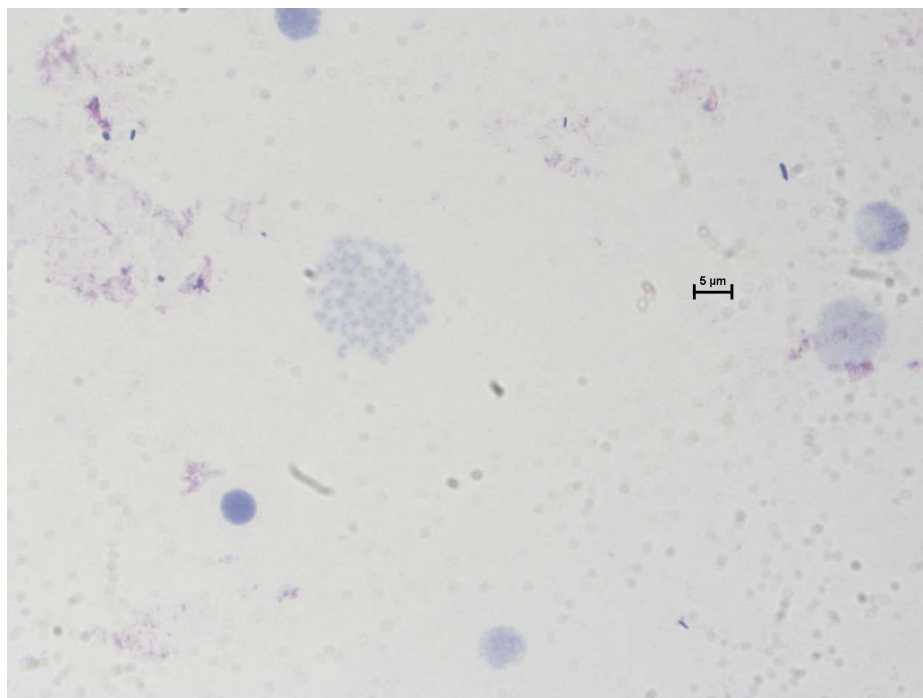

Sample of unprocessed metaphase spread from third treatment

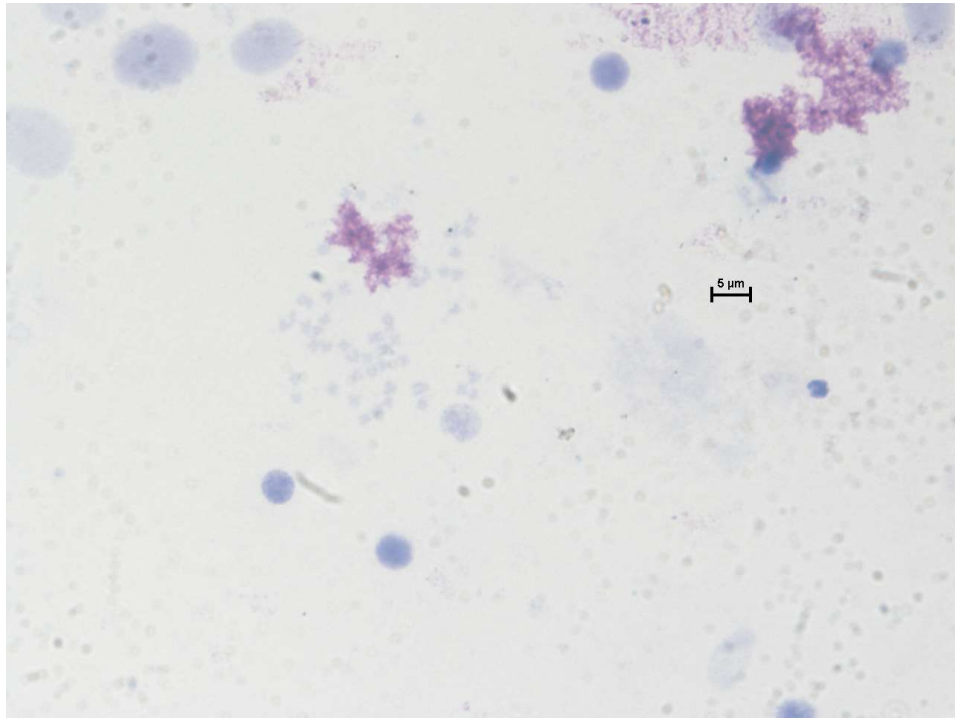

Sample of unprocessed metaphase spread from fourth treatment

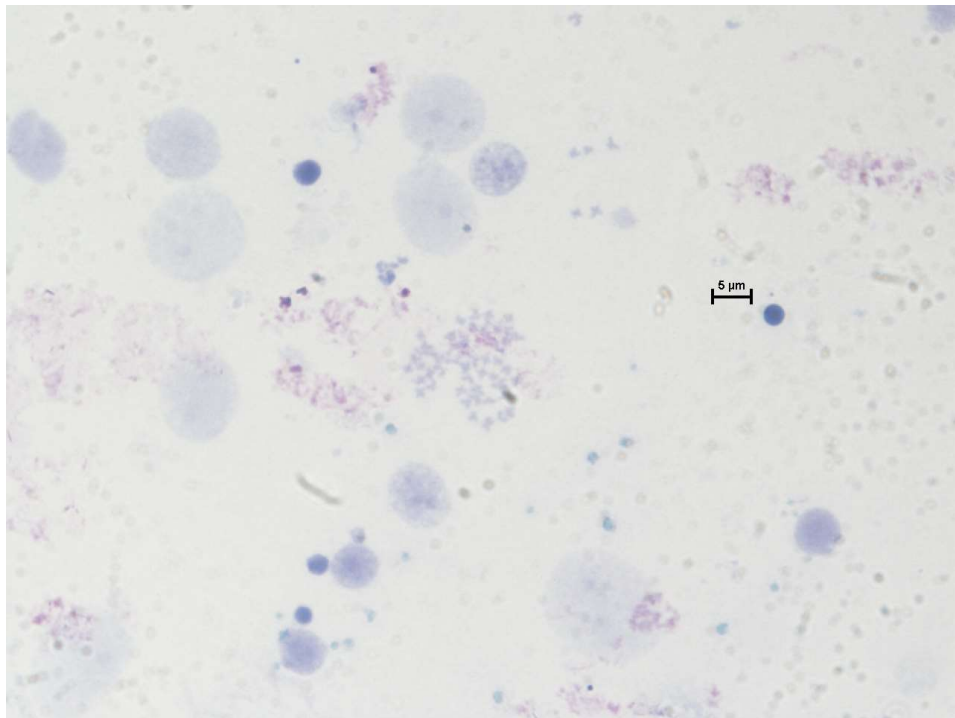

Sample of unprocessed metaphase spread from fourth treatment

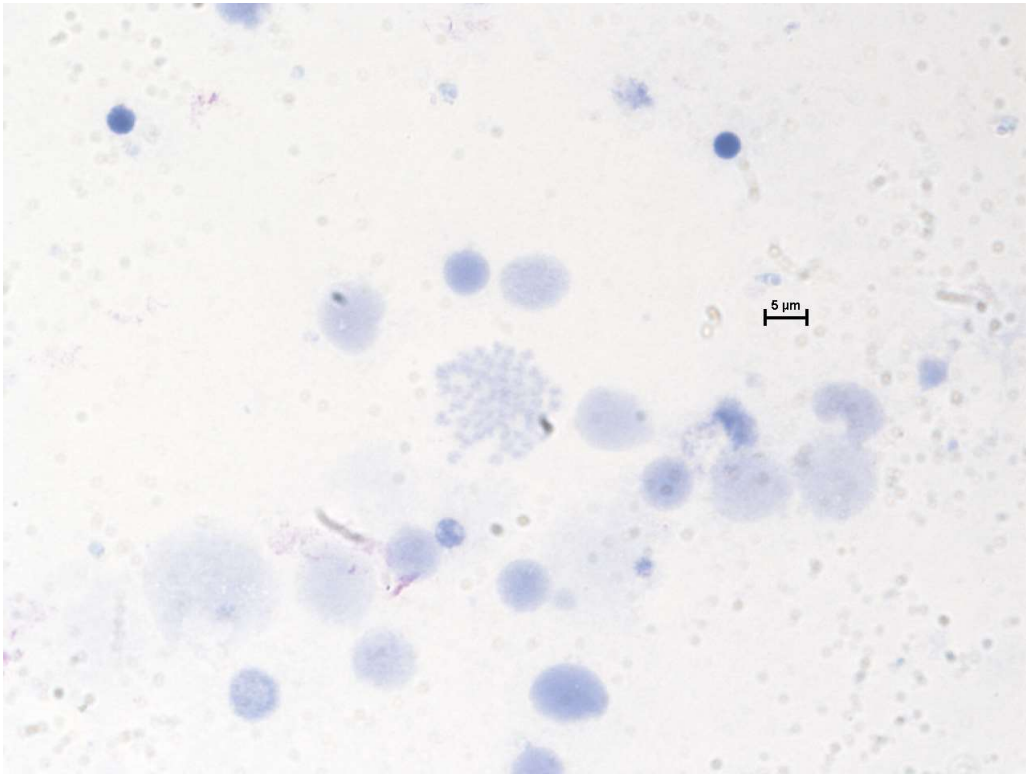

Sample of unprocessed metaphase spread from fourth treatment

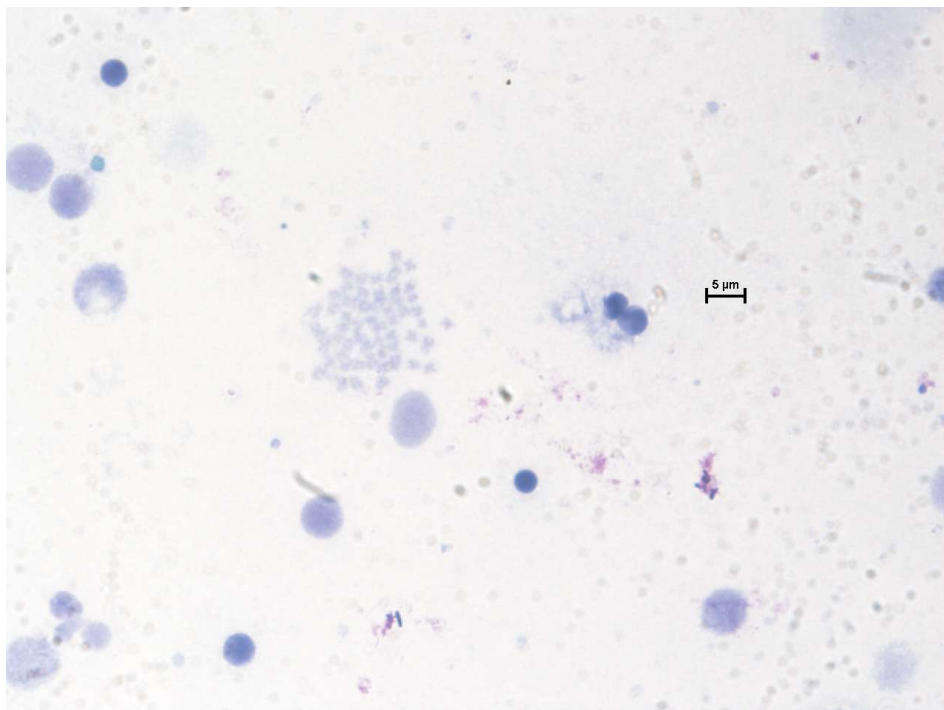

Sample of unprocessed metaphase spread from fourth treatment

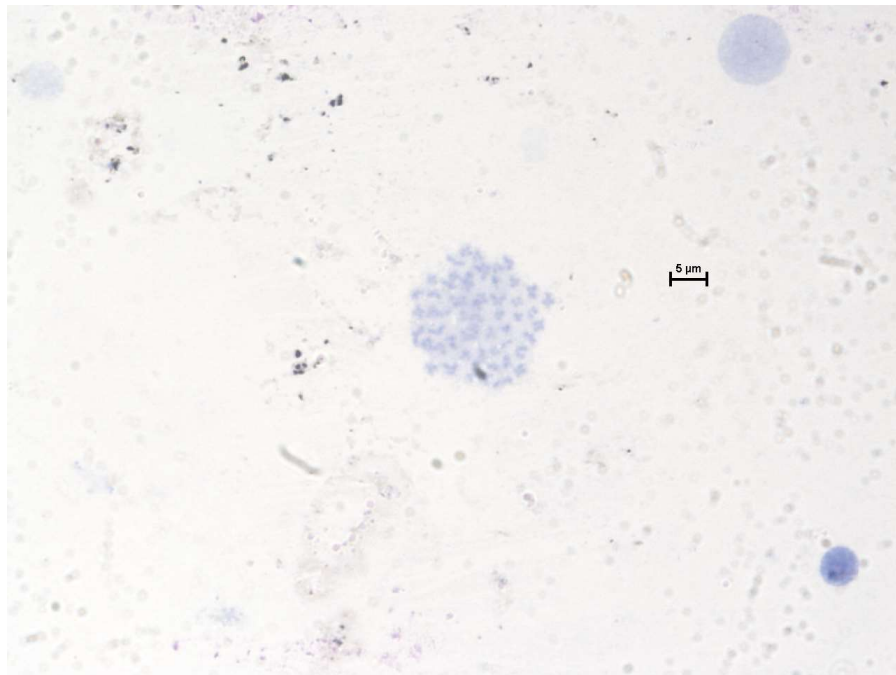

Sample of unprocessed metaphase spread from fourth treatment

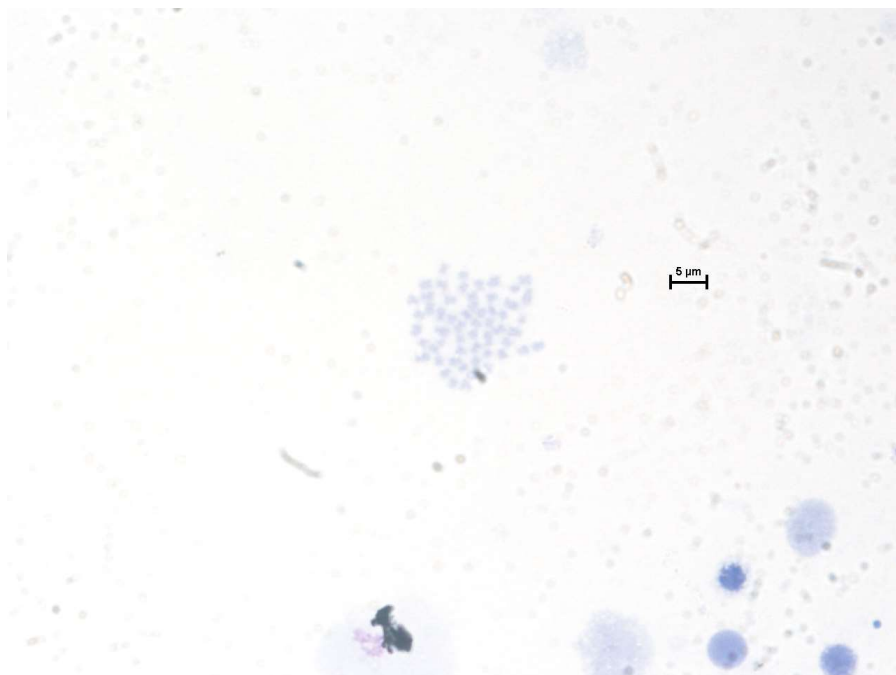

Sample of unprocessed metaphase spread from fourth treatment
